# Supplementary material for: Unintentionally doped high resistivity GaN layers with an InGaN interlayer grown by MOCVD
Source: Royal Society of Chemistry journal article supplement (doi:10.1039/c6ra10696j), 2016-01-01
Supplement: c6ra10696j1.pdf [file c6ra10696j1.pdf]

## Supplementary information

Both symmetric and asymmetric  $\omega$ - $2\theta$  scans are taken with a Bruker D8 triple-axis diffractometer using Cu  $K_{\alpha 1}$  radiation ( $\lambda = 0.15406$  nm).

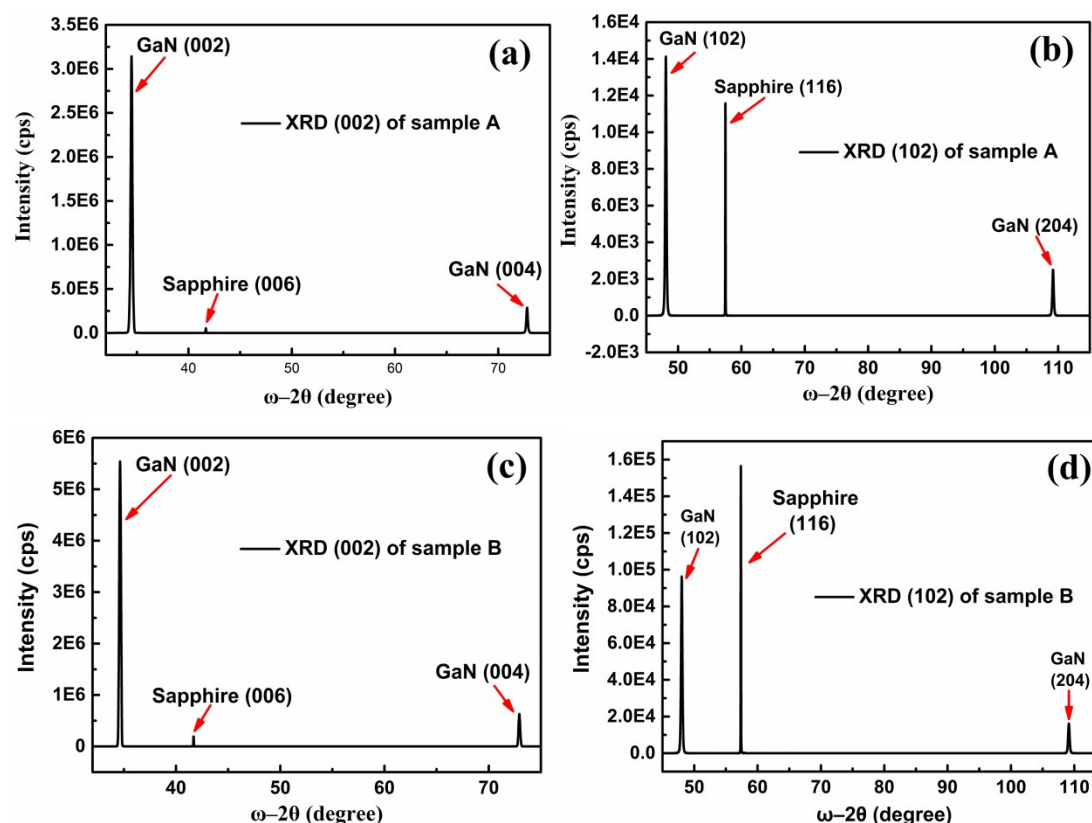

**Fig. 7** HRXRD  $\omega$ - $2\theta$  scans for planes (a) (002), (004) and (b) (102), (204) (b) of sample A and sample B, respectively.

Fig. 7 shows the XRD  $\omega$ - $2\theta$  scans of samples A and B. The GaN (002), (004) and (102), (204) diffraction peak positions were used to calculate the lattice constants  $c$  and  $a$  by using the following equations:<sup>1</sup>

$$d_{hkl} = \frac{\lambda}{2\sin(\theta_{hkl} + \Delta\theta)} = \frac{2\lambda}{2\sin(\theta_{2h2k2l} + \Delta\theta)} \quad (1)$$

$$d_{hkl} = \frac{1}{\sqrt{\frac{4}{3}\left(\frac{h^2 + hk + k^2}{a}\right)^2 + \left(\frac{l}{c}\right)^2}} \quad (2)$$

where  $(h k l)$  are the indices of the diffraction plane,  $\theta_{hkl}$  is the measured angular position of the  $(h k l)$  reflection,  $\lambda$  is the X-ray wavelength (0.154 nm for Cu  $K_{\alpha 1}$  radiation), and  $\Delta\theta$  is the zero error of the instrument.

The in-plane strain was obtained by using the formula:

$$\varepsilon_{//} = \frac{a - a_0}{a_0}$$

Hence, the residual stress in the films can be roughly estimated by using the formula:

$$\sigma = M \times \varepsilon_{//}$$

where  $\sigma$  is the in-plane stress,  $M$  ( $M_{\text{GaN}} = 202 \text{ GPa}^2$ ) is the biaxial elastic modulus, and  $\varepsilon$  is the in-plane strain. The lattice constants of strain-free GaN are  $a_0 = 0.31892 \text{ nm}$  and  $c_0 = 0.51850 \text{ nm}$ .<sup>1</sup> The calculated lattice constants, strains and stresses are listed in Table I :

Table I The calculated lattice constants, strains and stresses of samples A and B.

|                    | Sample A | Sample B |
|--------------------|----------|----------|
| c (nm)             | 0.51898  | 0.51907  |
| a (nm)             | 0.31836  | 0.31839  |
| $\varepsilon_{//}$ | -0.18%   | -0.17%   |
| $\sigma$ (GPa)     | -0.35    | -0.34    |

According to the calculated results, it can be concluded that the in-plane stress in both samples are compressive stress in nature. Moreover, the calculated in-plane stress in sample A is almost same as that of sample B. There seems a discrepancy between the stress values from XRD results and Raman measurements. This discrepancy may come from the domain size characteristic of each technique.<sup>3</sup> According to ref.3, the X-ray beam is scattered by the crystalline and the effect of lattice distortion is averaged over a large sample area through the whole depth for XRD characterization. In contrast, micro-Raman spectroscopy is a local technique that probes only the spot-size area with a shallow depth. Another source of error in the stress evaluation may come from the variation of the elastic modulus with film quality, which may be a significant source of error resulting in the discrepancy between the values obtained by these two techniques. However, it is a topic of ongoing investigation.

### Reference

1. L. Zhang, J. Yu, X. Hao, Y. Wu, Y. Dai, Y. Shao, H. Zhang and Y. Tian, *Scientific reports*, 2014, **4**.
2. K. Miwa and A. Fukumoto, *Phys. Rev. B*, 1993, **48**, 7897.
3. N. G. Ferreira, E. Abramof, E. J. Corat and V. J. Trava-Airoldi, *Carbon*, 2003, **41**, 1301.
